# Supplementary material for: The C-Reactive Protein to Albumin Ratio as a Predictor of Severe Side Effects of Adjuvant Chemotherapy in Stage III Colorectal Cancer Patients
Source: PLOS journal article supplement (doi:10.1371/journal.pone.0167967), 2016-12-08
Supplement: S1 (10.1371/journal.pone.0167967.s001) [file journal.pone.0167967.s001]

Supplementary Table 1: Details of side effects greater than grade 3

---

**Signs and symptoms**

|                            |           |
|----------------------------|-----------|
| <b>Neutropenia</b>         | <b>15</b> |
| <b>Anorexia</b>            | <b>6</b>  |
| <b>Diarrhea</b>            | <b>5</b>  |
| <b>Hyperbilirubinemia</b>  | <b>2</b>  |
| <b>Anaphylaxis</b>         | <b>1</b>  |
| <b>Perforation</b>         | <b>1</b>  |
| <b>Acute</b>               | <b>1</b>  |
| <b>leukoencephalopathy</b> |           |
| <b>Liver dysfunction</b>   | <b>1</b>  |
| <b>Hand-foot syndrome</b>  | <b>1</b>  |

|                        |          |
|------------------------|----------|
| <b>General fatigue</b> | <b>1</b> |
|------------------------|----------|

|                  |          |
|------------------|----------|
| <b>Pneumonia</b> | <b>1</b> |
|------------------|----------|
